# Supplementary material for: Single Source Precursor-based Solvothermal Synthesis of Heteroatom-doped Graphene and Its Energy Storage and Conversion Applications
Source: PubMed Central journal article supplement (PMC4090616; doi:10.1038/srep05639), 2014-07-10
Supplement: srep05639-s1.pdf [file srep05639-s1.pdf]

## Supplementary information

### **Single Source Precursor-based Solvothermal Synthesis of Heteroatom-doped Graphene and Its Energy Storage and Conversion Applications**

Bo Quan<sup>1</sup>, Seung-Ho Yu<sup>2,3,4</sup>, Dong Young Chung<sup>2,3</sup>, Aihua Jin<sup>2,3</sup>, Ji Hyun Park<sup>1</sup>, Yung-Eun Sung<sup>2,3\*</sup> & Yuanzhe Piao<sup>1,5\*</sup>

<sup>1</sup>Graduate School of Convergence Science and Technology, Seoul National University, Seoul 151-742, Republic of Korea.

<sup>2</sup>Center for Nanoparticle Research, Institute for Basic Science (IBS), Seoul 151-742, Republic of Korea.

<sup>3</sup>School of Chemical and Biological Engineering, Seoul National University, Seoul 151-742, Republic of Korea.

<sup>4</sup>Research Institute of Advanced Materials (RIAM), Seoul National University, Seoul 151-742, Republic of Korea.

<sup>5</sup>Advanced Institutes of Convergence Technology, Suwon 443-270, Republic of Korea.

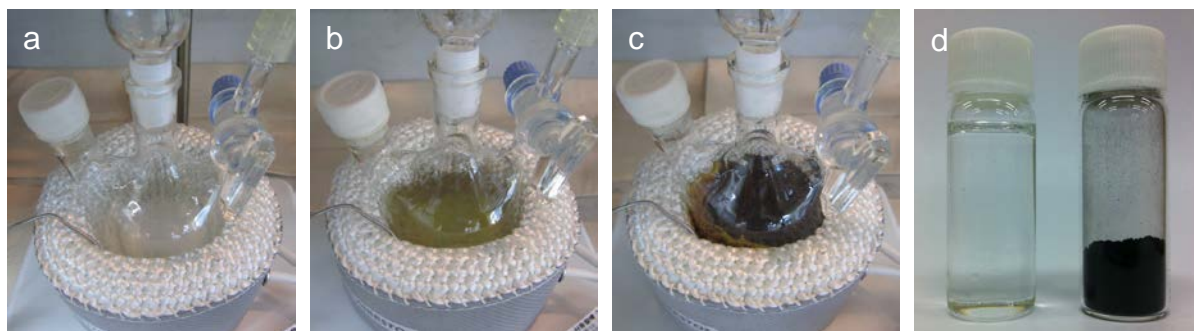

**Supplementary Figure S1:** Photographs of synthesis of the S-doped graphene. (a) A mixture of DMSO and NaOH in a reactor (room temperature). (b) The mixture started to boil at  $\sim 250$  °C, and (c) the mixture was boiling about 1 h. (d) 10 ml of DMSO and 0.35 g of the S-doped graphene.

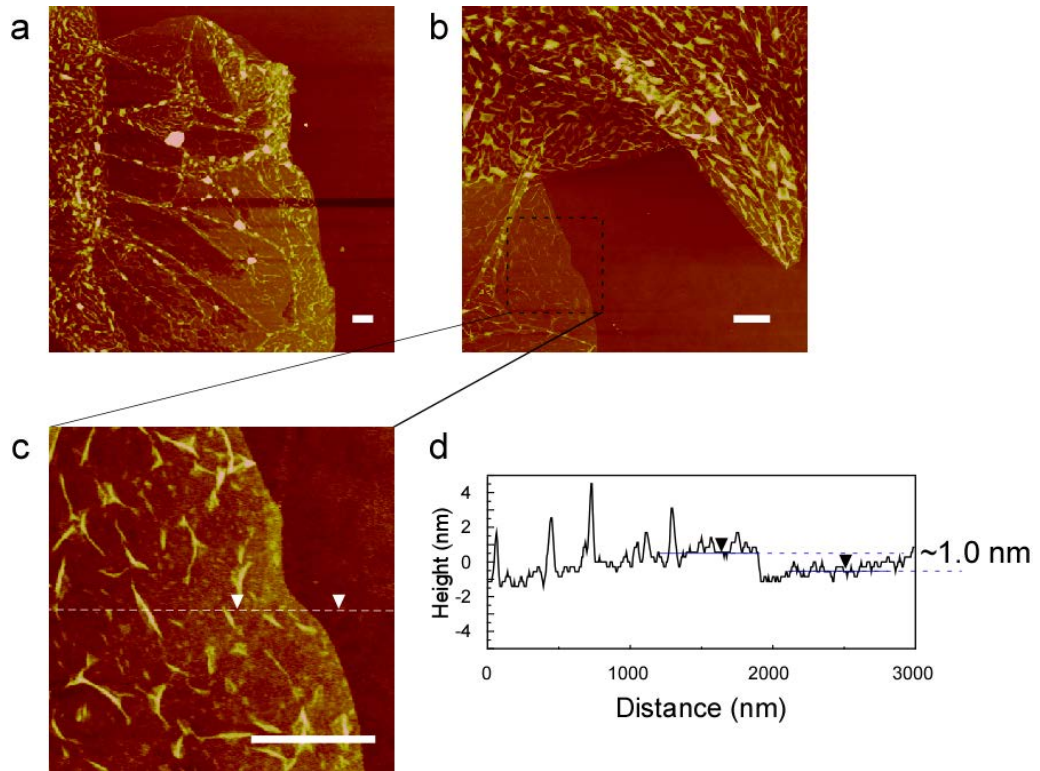

**Supplementary Figure S2:** AFM images of the S-doped graphene. (a, b, and c) AFM images of the S-doped graphene with different magnifications (All the scale bars are 1000 nm.) (d) Height profile of the S-doped graphene.

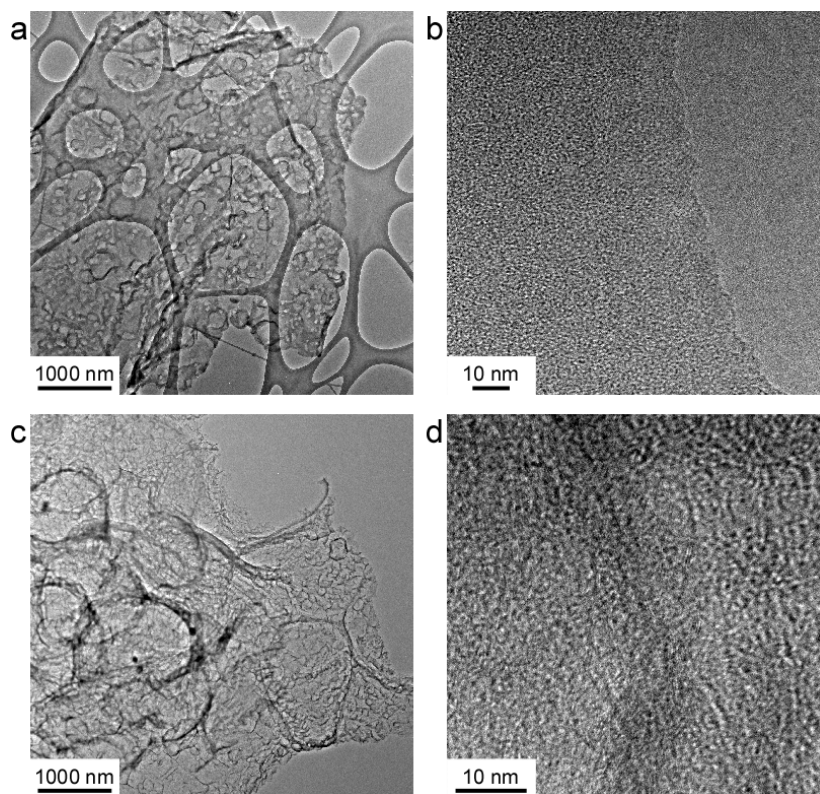

**Supplementary Figure S3:** TEM and high-resolution TEM images of the N-doped graphene and pristine solvothermal graphene. (a, b) TEM and HR- TEM images of the N-doped graphene. (c, d) TEM and HR-TEM images of the pristine solvothermal graphene.

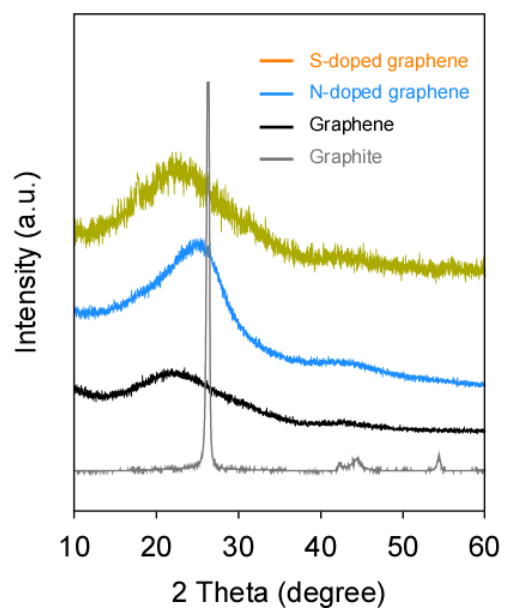

**Supplementary Figure S4:** XRD patterns of the S-doped graphene, N-doped graphene, pristine solvothermal graphene, and graphite.

## Bulk conductivity

Bulk conductivity of the S-doped graphene, N-doped graphene and pristine solvothermal graphene were measured according to a literature procedure<sup>1</sup>. The samples were filled into a channel; two sides of the channel are used as electrodes. The conductivity of samples was measured using the equation:  $\sigma=R \cdot L/A$

Where:

$\sigma$  is the conductivity,  $\text{Sm}^{-1}$

R is the resistance,  $\Omega$

L is the distance between the two electrodes, m

A is the cross-section area of the sample,  $\text{m}^2$

| <b>Sample</b>                         | <b>Conductivity (<math>\text{S m}^{-1}</math>)</b> |
|---------------------------------------|----------------------------------------------------|
| <b>S-doped graphene</b>               | $0.607 \times 10^{-3}$                             |
| <b>N-doped graphene</b>               | $0.416 \times 10^{-3}$                             |
| <b>Pristine graphene</b>              | 0.121                                              |
| <b>Pristine graphene<sup>20</sup></b> | 0.067                                              |

20 Choucair, M., Thordarson, P. & Stride, J. A. Gram-scale production of graphene based on solvothermal synthesis and sonication. *Nat. Nanotechnol.* **4**, 30-33 (2009).

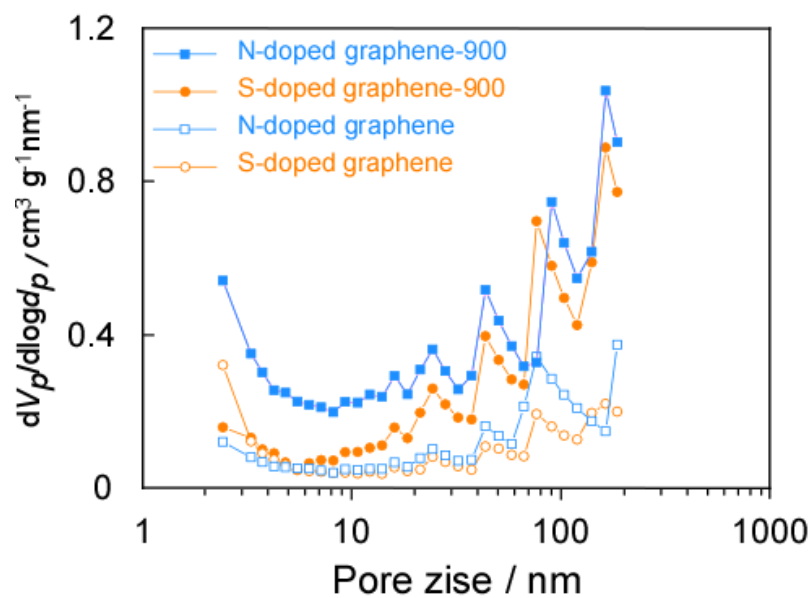

**Supplementary Figure S5:** Pore size analysis. Pore distributions of the S-doped graphene, N-doped graphene, S-doped graphene-900 (annealing at 900 °C), and N-doped graphene-900 (annealing at 900 °C).

**Supplementary Table S1:** Elemental analysis data of the S-doped graphene, N-doped graphene and pristine solvothermal graphene.

| Sample                                | % Composition/Mass |      |       |       |       |
|---------------------------------------|--------------------|------|-------|-------|-------|
|                                       | C                  | H    | N     | S     | O     |
| <b>S-doped graphene</b>               | 70.13              | 1.49 | 0.08  | 22.83 | 5.47  |
| <b>N-doped graphene</b>               | 65.41              | 2.40 | 12.25 | -     | 19.94 |
| <b>Pristine graphene</b>              | 88.41              | 0.99 | 0.09  | -     | 10.51 |
| <b>Pristine graphene<sup>20</sup></b> | 78.49              | 2.69 | -     | -     | 18.82 |

A previous study demonstrated that most of the oxygen present in solvothermal graphene was adsorbed water<sup>20</sup>.



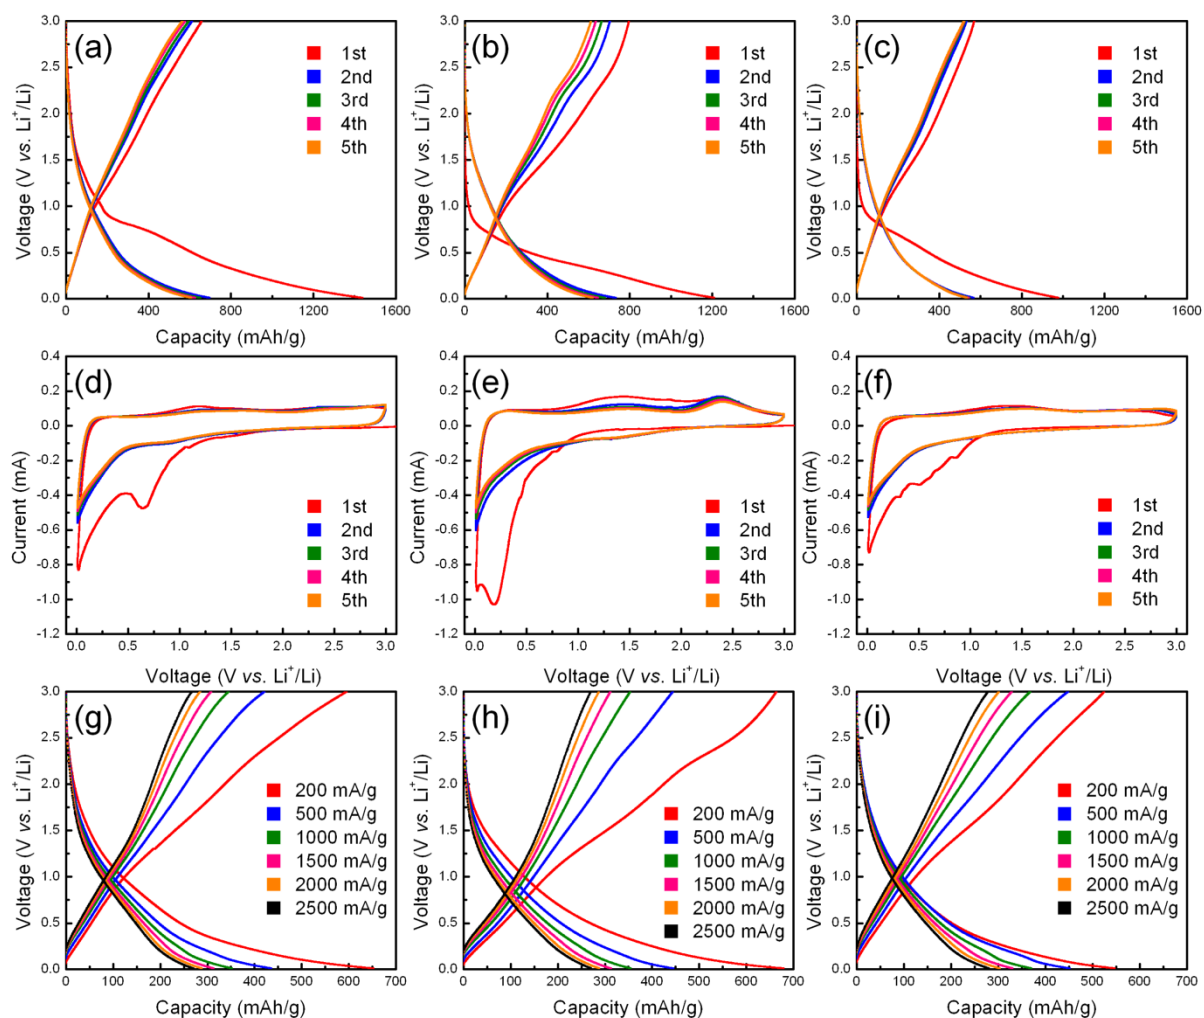

**Supplementary Figure S6:** Galvanostatic charge and discharge profiles of (a) the pristine solvothermal graphene, (b) S-doped graphene and (c) N-doped graphene electrodes at a current density of 200 mA g<sup>-1</sup> for initial 5 cycles. Cyclic voltammograms of (d) the pristine solvothermal graphene, (e) S-doped graphene and (f) N-doped graphene electrodes at a scanning rate of 0.1 mV s<sup>-1</sup>. Galvanostatic charge and discharge profiles of (g) the pristine solvothermal graphene, (h) S-doped graphene and (i) N-doped graphene electrodes at various current rates.

**Supplementary Table S2:** Reversible capacities of graphene as anode materials.

| sample                                                                        | Current density         | Voltage range (vs. Li <sup>+</sup> /Li) | Initial reversible capacity | Reversible capacity after cycles                                                                                            | Ref.      |
|-------------------------------------------------------------------------------|-------------------------|-----------------------------------------|-----------------------------|-----------------------------------------------------------------------------------------------------------------------------|-----------|
| GO annealed at 600 °C                                                         | 50 mAh g <sup>-1</sup>  | 0.005 – 3.0 V                           | 794 mAh g <sup>-1</sup>     | ~700 mAh g <sup>-1</sup> (15th cycle)                                                                                       | 30        |
| GO annealed at 300 °C                                                         | 50 mAh g <sup>-1</sup>  | 0.005 – 3.0 V                           | 1013 mAh g <sup>-1</sup>    | 834 mAh g <sup>-1</sup> (15th cycle)                                                                                        | 30        |
| Electron beam reduced GO                                                      | 50 mAh g <sup>-1</sup>  | 0.005 – 3.0 V                           | 1054 mAh g <sup>-1</sup>    | 784 mAh g <sup>-1</sup> (15th cycle)                                                                                        | 30        |
| Hydrazine reduced GO                                                          | 50 mAh g <sup>-1</sup>  | 0.005 – 3.0 V                           | 330 mAh g <sup>-1</sup>     | ~200 mAh g <sup>-1</sup> (15th cycle)                                                                                       | 30        |
| GO annealed at 1050 °C                                                        | 100 mAh g <sup>-1</sup> | 0.01 – 3.0 V                            | ~400 mAh g <sup>-1</sup>    | ~270 mAh g <sup>-1</sup> (100th cycle)                                                                                      | 26        |
| GO annealed at 1050 °C + Heat treatment in NH <sub>3</sub> (N-doped graphene) | 100 mAh g <sup>-1</sup> | 0.01 – 3.0 V                            | ~500 mAh g <sup>-1</sup>    | ~360 mAh g <sup>-1</sup> (17th cycle),<br>~450 mAh g <sup>-1</sup> (100th cycle),<br>~680 mAh g <sup>-1</sup> (500th cycle) | 26        |
| GO annealed at 1000 °C with triphenylmethane                                  | 100 mAh g <sup>-1</sup> | 0.01 – 3.0 V                            | 280 mAh g <sup>-1</sup>     | ~280 mAh g <sup>-1</sup> (80th cycle)                                                                                       | 14        |
| GO annealed at 1000 °C with triphenylphosphine (P-doped graphene)             | 100 mAh g <sup>-1</sup> | 0.01 – 3.0 V                            | 460 mAh g <sup>-1</sup>     | ~460 mAh g <sup>-1</sup> (80th cycle)                                                                                       | 14        |
| Hydrazine reduced GO                                                          | 50 mAh g <sup>-1</sup>  | 0.01 – 3.5 V                            | 540 mAh g <sup>-1</sup>     | 290 mAh g <sup>-1</sup> (20th cycle)                                                                                        | 31        |
| GO annealed at 500 °C                                                         | 50 mAh g <sup>-1</sup>  | 0.01 – 3.0 V                            | 955 mAh g <sup>-1</sup>     | 638 mAh g <sup>-1</sup> (30th cycle)                                                                                        | 32        |
| GO annealed at 600 °C in NH <sub>3</sub> (N-doped graphene)                   | 50 mAh g <sup>-1</sup>  | 0.01 – 3.0 V                            | 1043 mAh g <sup>-1</sup>    | 873 mAh g <sup>-1</sup> (30th cycle)                                                                                        | 32        |
| GO annealed at 800 °C in BCl <sub>3</sub> (B-doped graphene)                  | 50 mAh g <sup>-1</sup>  | 0.01 – 3.0 V                            | 1549 mAh g <sup>-1</sup>    | 1227 mAh g <sup>-1</sup> (30th cycle)                                                                                       | 32        |
| Solvothermal synthesis using methanol (Pristine graphene)                     | 200 mAh g <sup>-1</sup> | 0.01 – 3.0 V                            | 660 mAh g <sup>-1</sup>     | 577 mAh g <sup>-1</sup> (150th cycle)                                                                                       | this work |
| Solvothermal synthesis using DMF (N-doped graphene)                           | 200 mAh g <sup>-1</sup> | 0.01 – 3.0 V                            | 797 mAh g <sup>-1</sup>     | 479 mAh g <sup>-1</sup> (150th cycle)                                                                                       | this work |
| Solvothermal synthesis using DMSO (S-doped graphene)                          | 200 mAh g <sup>-1</sup> | 0.01 – 3.0 V                            | 570 mAh g <sup>-1</sup>     | 491 mAh g <sup>-1</sup> (150th cycle)                                                                                       | this work |

- Graphene and its Multifunctional Applications for Oxygen Reduction Reaction and Lithium Ion Batteries. *Adv. Mater.* **25**, 4932-4937 (2013).
- 26 Li, X. *et al.* Superior cycle stability of nitrogen-doped graphene nanosheets as anodes for lithium ion batteries. *Electrochem. Comm.* **13**, 822-825 (2011).
- 30 Pan, D. *et al.* Li Storage Properties of Disordered Graphene Nanosheets. *Chem. Mater.* **21**, 3136-3142 (2009).
- 31 Yoo, E. *et al.* Large Reversible Li Storage of Graphene Nanosheet Families for Use in Rechargeable Lithium Ion Batteries. *Nano Lett.* **8**, 2277-2282 (2008).
- 32 Wu, Z.-S., Ren, W., Xu, L., Li, F. & Cheng, H.-M. Doped Graphene Sheets As Anode Materials with Superhigh Rate and Large Capacity for Lithium Ion Batteries. *ACS Nano* **5**, 5463-5471 (2011).

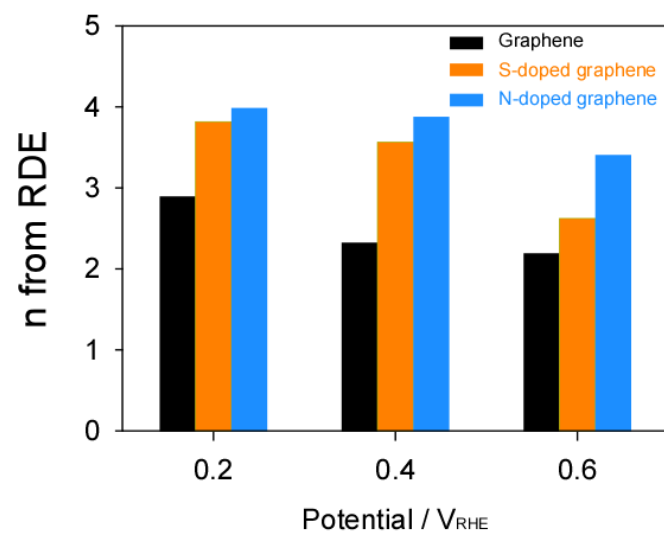

**Supplementary Figure S7:** Potential dependent electron transfer number of the pristine solvothermal graphene, N-doped graphene and S-doped graphene.
